# Supplementary material for: The Antiviral Small-Interfering RNA Pathway Induces Zika Virus Resistance in Transgenic Aedes aegypti
Source: PubMed Central journal article supplement (PMC7692394; doi:10.3390/v12111231), 2020-10-30
Supplement: viruses-12-01231-s001.pdf [file viruses-12-01231-s001.pdf]

**Supplementary Materials:** The following are available online at [www.mdpi.com/xxx/s1](http://www.mdpi.com/xxx/s1)

**Table S1.** Primer sequences used in this study

| Primer  | Sequence (5' to 3')                                                     | Purpose                                                  |
|---------|-------------------------------------------------------------------------|----------------------------------------------------------|
| BR-4    | GAAATTAATACGACTCACTATAGGTG<br>GTTCTCAGGCGACAGTTGTTTTAGAG<br>CTAGAAATAGC | Forward primer for sgRNA 3                               |
| BR-5    | GAAATTAATACGACTCACTATAGGTA<br>ATGGCACAGGCTATAGGTTTTAGAGC<br>TAGAAATAGC  | Forward primer for sgRNA 4                               |
| BR-6    | GAAATTAATACGACTCACTATAGGAC<br>CAACCGCAGTCATTGTGGTTTTAGAG<br>CTAGAAATAGC | Forward primer for sgRNA 5                               |
| BR-7    | GAAATTAATACGACTCACTATAGGAG<br>AACCACACAATGACTGGTTTTAGAGCT<br>AGAAATAGC  | Forward primer for sgRNA 6                               |
| BR-20   | AACGAGATGCCTTCTCCTGA                                                    | Genomic primer for indel assessment                      |
| BR-23   | AAAATGGCGTTTCGATGAGAC                                                   | Genomic primer for indel assessment                      |
| BR-51   | CATAAGCTTGCTAATCGGTGTCAATTC<br>CATC                                     | Upstream homology arm forward                            |
| BR-52   | CATGGATCCTAACTCGAGTCTCAGGC<br>GACAGTATGGCTC                             | Upstream homology arm reverse to introduce a XhoI site   |
| BR-53   | CATGGATCCATACTCGAGCTGCGGTT<br>GGTCGTGTATTTGAAG                          | Downstream homology arm forward to introduce a XhoI site |
| BR-54   | CATCTCGAGAAATTCGAGCTCGCCCG<br>G                                         | 3xP3FOR-XhoI forward                                     |
| BR-55   | CATCTCGAGCCGTACGCGTATTCGATA<br>AG                                       | SV40REV-XhoI reverse                                     |
| BR-73   | GGGAAGGTTTCTGGTACAGG                                                    | Downstream homology arm reverse                          |
| BR-94   | CATTATCTCGAGCTTCACGTTTTCCCA<br>GGTCAGAAGC                               | attP-XhoI forward                                        |
| BR-10 2 | CTGCTATGTGGCGCGGTATTATC                                                 | $\beta$ -lactamase breaking primer for Gibson assembly   |
| BR-103  | GATAATACCGCGCCACATAGCAG                                                 | $\beta$ -lactamase breaking primer for Gibson assembly   |

|        |                                                          |                                                                  |
|--------|----------------------------------------------------------|------------------------------------------------------------------|
| BR-124 | AATCTCGAGCTAGCACTAGTCGCGCT<br>CGCGCG                     | attP-NheI reverse                                                |
| BR-125 | CAATATCTAGAGCCGTACGCGTATTC<br>GATAAG                     | SV40-XbaI reverse                                                |
| BR-126 | ACAATTCTAGAGAAATTCGAGCTCGC<br>CCGG                       | 3xP3-XbaI forward                                                |
| BR-138 | TCGAGAATTCGCTAGCACTAGTCGCG<br>CTCGCGCG                   | attP-NheI-EcoRI reverse                                          |
| BR-139 | CATTATCCGCGGCTTCACGTTTTCCCA<br>GGTCAGAAGC                | attP-SacII forward                                               |
| BR-211 | AGAAACCGCGGAGATCTCGGCCGCGA<br>CTCTAGATC                  | SV40-SacII-BglIII forward                                        |
| BR-212 | CAATAGCTAGCTAAGATACATTGATG<br>AGTTTGGACAAAC              | SV40-NheI reverse                                                |
| BR-213 | AAACCTCTCGAGCGACCAAC                                     | Anti-ZIKV dsRNA trigger + intron-XhoI                            |
| BR-214 | GGTTTCTGCAGCTGCCTAATGATATAT<br>TTTTAAT                   | Anti-ZIKV dsRNA trigger + intron-PstI                            |
| BR-219 | ATCGAGGCCTGAGCTCTACGCGTGC<br>TAGTTTTTG                   | <i>Carboxypeptidase A</i> promoter-StuI forward                  |
| BR-220 | ATAGTAATCTCGAGCGGCCGCTGCA<br>G                           | <i>Carboxypeptidase A</i> promoter-XhoI reverse                  |
| BR-223 | TCGGCATGGACGAGCTGTAC                                     | ECFP anchored primer running out of the end of<br>the color cds  |
| BR-243 | CGGCCGCGACTCTAGATC                                       | Intermediate for final Gibson assembly                           |
| BR-245 | TAGTGATTAATAATATATCATTAGGCA<br>GCTGATCTTTGCTTTTCTGGCTCAG | ZIKV dsRNA trigger sense strand for final Gibson<br>assembly     |
| BR-250 | TCTCCGCGGTTTCTCTAGTGGATCCCC<br>CGGGCGACCAACAACACCATAATGG | ZIKV dsRNA trigger sense strand for final Gibson<br>assembly     |
| BR-248 | CCCGGGGATCCACTAG                                         | Intermediate for final Gibson assembly                           |
| BR-345 | ATCACTAGCCCGGGCTGCA                                      | <i>Carboxypeptidase A</i> anchored primer running into<br>the IR |

|        |                                                                                                                                                                                                                                                                                                                                                                                                                                                                                                                                                                                                                                                                                                                                                       |                                                                                                     |
|--------|-------------------------------------------------------------------------------------------------------------------------------------------------------------------------------------------------------------------------------------------------------------------------------------------------------------------------------------------------------------------------------------------------------------------------------------------------------------------------------------------------------------------------------------------------------------------------------------------------------------------------------------------------------------------------------------------------------------------------------------------------------|-----------------------------------------------------------------------------------------------------|
|        |                                                                                                                                                                                                                                                                                                                                                                                                                                                                                                                                                                                                                                                                                                                                                       |                                                                                                     |
| BR-347 | GGAGGTGAGCACCCAATCATCAG                                                                                                                                                                                                                                                                                                                                                                                                                                                                                                                                                                                                                                                                                                                               | <i>sialokinin1</i> intron anchored primer running towards the IR promoter                           |
| BR-348 | AATCACTAACAGAACTTTGAACAAAAT<br>C                                                                                                                                                                                                                                                                                                                                                                                                                                                                                                                                                                                                                                                                                                                      | <i>sialokinin1</i> intron anchored primer running towards the inverted-repeat IR terminator         |
| BR-240 | AAACCTCTCGAGCGACCAACAACACC<br>ATAATGGAAGACAGTGTGCCGGCAGA<br>GGTGTGGACCAGACACGGAGAGAAA<br>AGAGTGCTCAAACCGAGGTGGATGG<br>ACGCCAGAGTTTGTTCAGATCATGCG<br>GCCCTGAAGTCATTCAAGGAGTTTGC<br>CGCTGGGAAAAGAGGAGCGGCTTTT<br>GGAGTGATGGAAGCCCTGGGAACAC<br>TGCCAGGACACATGACAGAGAGATTC<br>CAGGAAGCCATTGACAACCTCGCTGT<br>GCTCATGCGGGCAGAGACTGGAAGC<br>AGGCCTTACAAAGCCGCGGCGGCCCA<br>ATTGCCGGAGACCCTAGAGACCATAA<br>TGCTTTTGGGGTTGCTGGGAACAGTC<br>TCGCTGGGAATCTTCTTCGTCTTGATG<br>AGGAACAAGGGCATAGGGAAGATGG<br>GCTTTGGAATGGTGA CTCTTGGGGCC<br>AGCGCATGGCTCATGTGGCTCTCGGA<br>AATTGAGCCAGCCAGAATTGCATGTG<br>TCCTCATTGTTGTGTTCTATTGCTGGT<br>GGTGCTCATACTGAGCCAGAAAAGC<br>AAAGATCGGAGGTGAGCACCCAATCA<br>TCAGATTTTGTCAAAGTTCTGTTAGT<br>GATTAATAATATATCATTAGGCAGCT<br>GCAGAAACC | XhoI/PstI tagged <i>sialokinin1</i> intron and anti-ZIKV RNAi trigger sequence used to construct IR |

**Table S2.** Genomic location of the desired target insertion site for the inverted repeat transgene and the locations of the closest sgRNAs that did not contain predicted off-target sites in the *Ae. aegypti* genome.

| Location               | Embryos injected (total N) | <i>Ae. aegypti</i> Liverpool strain equivalent cut site <sup>1</sup> | Δ distance (bp) | Synthego score (average indel% +/- SEM) |
|------------------------|----------------------------|----------------------------------------------------------------------|-----------------|-----------------------------------------|
| Dong et al., 2017 [28] | n/a                        | 2:321382845-321382846                                                | 0               | n/a                                     |
| sgRNA3                 | 424                        | 2:321382201                                                          | 644             | 0                                       |
| sgRNA4                 | 282                        | 2:321382958                                                          | 112             | 0                                       |
| sgRNA5                 | 282                        | 2:321382222                                                          | 623             | 17.0 ± 2.5                              |
| sgRNA6                 | 324                        | 2:321382228                                                          | 629             | 43.3 ± 3.4                              |

<sup>1</sup>*Ae. aegypti* genome version AGWG AaegL5, vectorbase.org

**Figure S1**

**>ZIKV-specific NS3/4A IR sequence**

CGACCAACAACACCATAATGGAAGACAGTGTGCCGGCAGAGGTGTGGACCAGACACGGAGAGAAAAGAGTGCTC  
AAACCGAGGTGGATGGACGCCAGAGTTTGTTCAGATCATGCGGCCCTGAAGTCATTCAAGGAGTTGCCGCTGGG  
AAAAGAGGAGCGGCTTTTGGAGTGATGGAAGCCCTGGGAACACTGCCAGGACACATGACAGAGAGATTCCAGGA  
AGCCATTGACAACCTCGCTGTGCTCATGCGGGCAGAGACTGGAAGCAGGCCTTACAAAGCCGCGGGCGCCCAATT  
GCCGGAGACCCTAGAGACCATAATGCTTTTGGGGTTGCTGGGAACAGTCTCGCTGGGAATCTTCTTCGTCTTGATG  
AGGAACAAGGGCATAGGGAAGATGGGCTTTGGAATGGTGACTCTTGGGGCCAGCGCATGGCTCATGTGGCTCTC  
GGAAATTGAGCCAGCCAGAATTGCATGTGTCTCATTGTTGTGTTCTATTGCTGGTGGTGCTCATACTGAGCCA  
GAAAAGCAAAGATCAGCTGCCTAATGATATATTTTTAATCACTAACAGAACTTTGAACAAAATCTGATGATTGGGT  
GCTCACCTCGATCTTTGCTTTTCTGGCTCAGGTATGAGCACCACCAGCAATAGGAACACAACAATGAGGACACAT  
GCAATTCTGGCTGGCTCAATTTCCGAGAGCCACATGAGCCATGCGCTGGCCCAAGAGTCACCATTCAAAGCCCA  
TCTTCCCTATGCCCTTGTTCCTCATCAAGACGAAGAAGATTCCCAGCGAGACTGTTCCCAGCAACCCAAAAGCATT  
ATGGTCTCTAGGGTCTCCGGCAATTGGGCCGCCGCGGCTTTGTAAGGCCTGCTTCCAGTCTCTGCCCGCATGAGCA  
CAGCGAGGTTGTCAATGGCTTCTGGAATCTCTGTGTCATGTGTCCTGGCAGTGTCCCAGGGCTCCATCACTCCA  
AAAGCCGCTCCTTTTTCCAGCGGCAAACCTCTTGAATGACTTCAGGGCCGCATGATCTGAACAAAATCTGGCGT  
CCATCCACCTCGGTTTGGAGCACTCTTTTCTCTCCGTGTCTGGTCCACACCTCTGCCGGCACACTGTCTTCCATTATGG  
TGTTGTTGGTCGC
